# Supplementary material
Source: publisher figshare collection journal article supplement (https://acs.figshare.com/ndownloader/files/13998596)
Supplement: Supplementary file 1 [file 13998596]

# **Supplementary Information**

## **Broadband Emission in Hybrid Organic-Inorganic Halides of Group 12 Metals**

Rachel Roccanova,<sup>1</sup> Matthew Houck,<sup>1</sup> Aymen Yangui,<sup>1</sup> Dan Han,<sup>2,3,4</sup> Hongliang Shi,<sup>5</sup> Yuntao Wu,<sup>6,7</sup> Daniel T. Glatzhofer,<sup>1</sup> Douglas R. Powell,<sup>1</sup> Shiyu Chen,<sup>3</sup> Houcem Fourati,<sup>8</sup> Alain Lussan,<sup>8</sup> Kamel Boukheddaden,<sup>8</sup> Mao-Hua Du,<sup>4\*</sup> Bayrammurad Saparov<sup>1\*</sup>

<sup>1</sup>Department of Chemistry and Biochemistry, University of Oklahoma, 101 Stephenson Parkway, Norman, OK 73019, USA

<sup>2</sup>Key Laboratory of Polar Materials and Devices (Ministry of Education), East China Normal University, Shanghai 200241, China

<sup>3</sup>Department of Physics, East China Normal University, Shanghai 200241, China

<sup>4</sup>Materials Science and Technology Division, Oak Ridge National Laboratory, Oak Ridge, TN 37831, USA

<sup>5</sup>Key Laboratory of Micro-Nano Measurement-Manipulation and Physics (Ministry of Education), Department of Physics, Beihang University, Beijing 100191, China

<sup>6</sup>Scintillation Materials Research Center, University of Tennessee, Knoxville, TN 37996, USA

<sup>7</sup>Department of Materials Science and Engineering, University of Tennessee, Knoxville, TN 37996, USA

<sup>8</sup>Groupe d'Etudes de la Matière Condensée, UMR CNRS 8653-Université de Versailles Saint Quentin En Yvelines, Université Paris-Saclay, 45 Avenue des États-Unis, 78035 Versailles, France

## Synthesis of trimethyl(2,3,4,5,6-pentamethylbenzyl)ammonium bromide and iodide salts

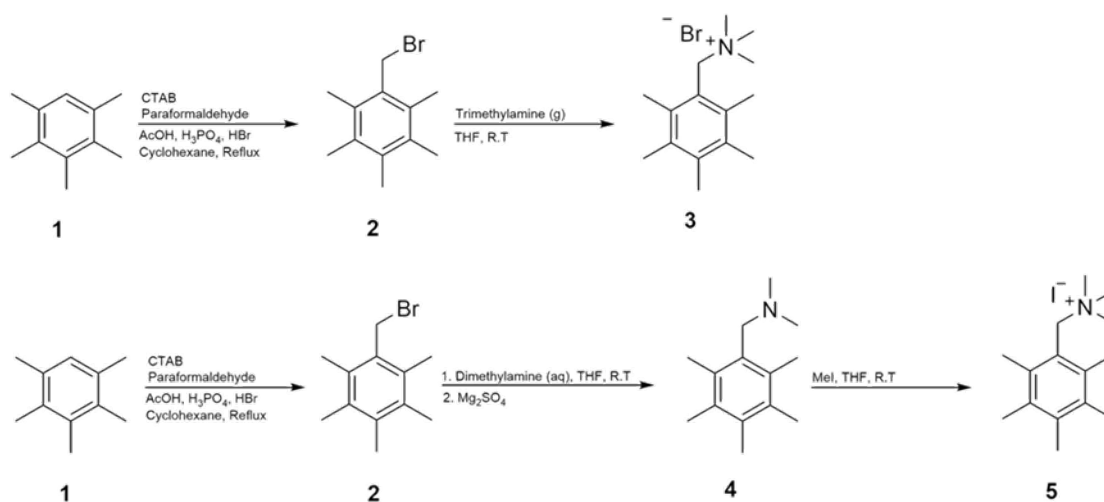

**Scheme S1.** Syntheses of the bromide ((R)Br, **3**) and iodide ((R)I, **5**) salts used in the formation of the target hybrid organic-inorganic compounds.

**Synthesis of 1-(bromomethyl)-2,3,4,5,6-pentamethylbenzene (2):** A three necked round bottom flask fitted with a reflux condenser was charged with 2.00 g (13.5 mmol) pentamethylbenzene (**1**), 0.626 g (20.8 mmol) paraformaldehyde, 0.226 g (0.620 mmol) cetyltrimethylammonium bromide (CTAB), cyclohexane (20 mL), acetic acid (10 mL), and phosphoric acid (0.5 mL). The reaction mixture was stirred vigorously (magnetic) and 10 mL of 48% hydrobromic acid was added using a dropping funnel attached to a side arm of the flask. The mixture was heated to 80 °C for 24 hours. The reaction mixture was cooled using an ice bath, diluted with 20 mL of water, transferred to an Erlenmeyer flask, and extracted three times with dichloromethane using a separatory funnel. The combined organic layers were dried over  $\text{Mg}_2\text{SO}_4$ , which was removed by vacuum filtration, and the filtrate was concentrated under reduced pressure to give product **2** in 94% yield as a white

polycrystalline solid. The  $^1\text{H}$ -NMR spectrum of **2** matched that reported in the literature (Figure S1).<sup>1</sup>

**Synthesis of trimethyl (2,3,4,5,6-pentamethylbenzyl) ammonium bromide ((R)Br, 3):** A round bottom flask was charged with 1.00 g (4.10 mmol) bromide **2** and THF (50 mL). The reaction flask was sealed with a rubber septum and an excess of trimethylamine gas was introduced into the reaction flask through a cannula needle. The reaction mixture was stirred magnetically overnight at room temperature. The white solid that formed was collected by gentle vacuum filtration and dried under reduced pressure. Product **3** was obtained in 89% yield as the monohydrate; mp 219-220 °C (lit mp 221-222 °C).  $^1\text{H}$ -NMR ( $\text{CDCl}_3$ ,  $\delta$ , ppm): 2.24 (s, 6H,  $\text{CH}_3$ ), 2.28 (s, 3H,  $\text{CH}_3$ ), 2.45 (s, 6H,  $\text{CH}_3$ ), 3.37 (s, 9H, N- $\text{CH}_3$ ), 5.04 (s, 2H,  $\text{CH}_2\text{-N}$ ) (Figure S2).<sup>2</sup>

**Synthesis of N,N,2,3,4,5,6-heptamethyl-benzylamine (4):** A 100 mL round bottom flask was charged with 1.00 g of **2** (4.10 mmol) and THF (50 mL). Dimethylamine was introduced by adding 1.41 g of a 40 wt% aqueous solution (0.564 g dimethylamine, 12.5 mmol) dropwise and the reaction flask was stoppered. The solution was stirred magnetically for 24 hours, the reaction was quenched by the addition of solid  $\text{Mg}_2\text{SO}_4$ . The  $\text{Mg}_2\text{SO}_4$  was removed by vacuum filtration, the filtrate was concentrated under reduced pressure for 24 hours to give product **4** in 86% yield a white crystalline solid.  $^1\text{H}$ -NMR ( $\text{CDCl}_3$ ,  $\delta$ , ppm): 2.24 (s, 6H,  $\text{CH}_3$ ), 2.26 (s, 3H,  $\text{CH}_3$ ), 2.28 (s, 6H, N- $\text{CH}_3$ ), 2.33 (s, 6H,  $\text{CH}_3$ ), 3.49 (s, 2H,  $\text{CH}_2\text{-N}$ ) (Figure S3).<sup>3</sup>

**Synthesis of trimethyl (2,3,4,5,6-pentamethylbenzyl) ammonium iodide ((R)I, 5):** A 100 mL round bottom flask was charged with 1.00 g of **4** (4.90 mmol) and THF (20 mL). Methyl iodide

(1.39 g, 9.80 mmol) were added dropwise to the solution. The flask was stoppered, and the solution was stirred magnetically for 24 hours. Within the first 3 hours most of the product precipitated as a white solid. Solvent and excess methyl iodide were removed under reduced pressure to give product **5** in 98% yield as a white polycrystalline solid; mp 220-223 °C (lit mp 220-221 °C). <sup>1</sup>H NMR (CDCl<sub>3</sub>, δ, ppm): 2.25 (s, 6H, CH<sub>3</sub>), 2.29 (s, 3H, CH<sub>3</sub>), 2.44 (s, 6H, CH<sub>3</sub>), 3.34 (s, 9H, N-CH<sub>3</sub>), 5.00 (s, 2H, CH<sub>2</sub>-N) (Figure S4).<sup>3</sup>

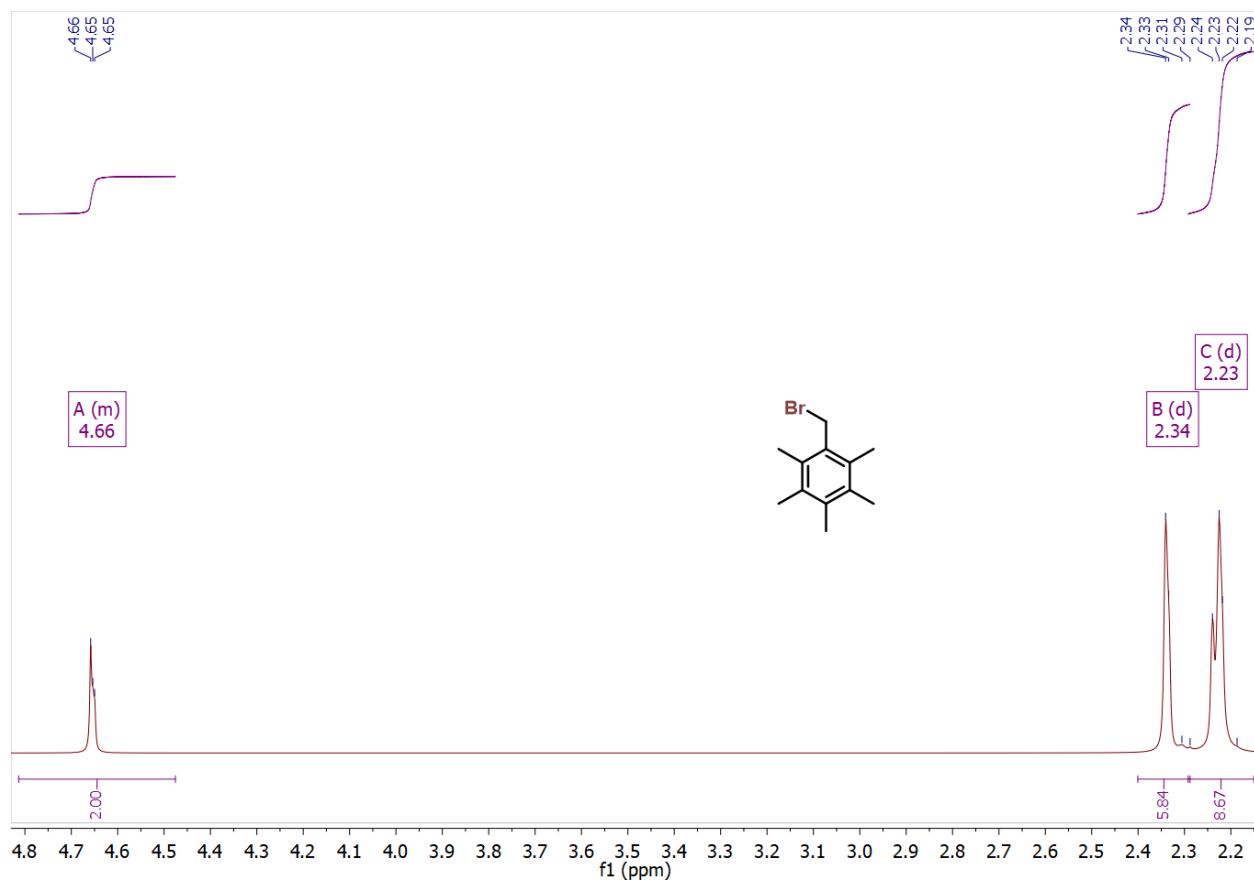

**Figure S1.** NMR spectrum of the 1-(bromomethyl)-2,3,4,5,6-pentamethylbenzene (**2**) precursor in CDCl<sub>3</sub>.

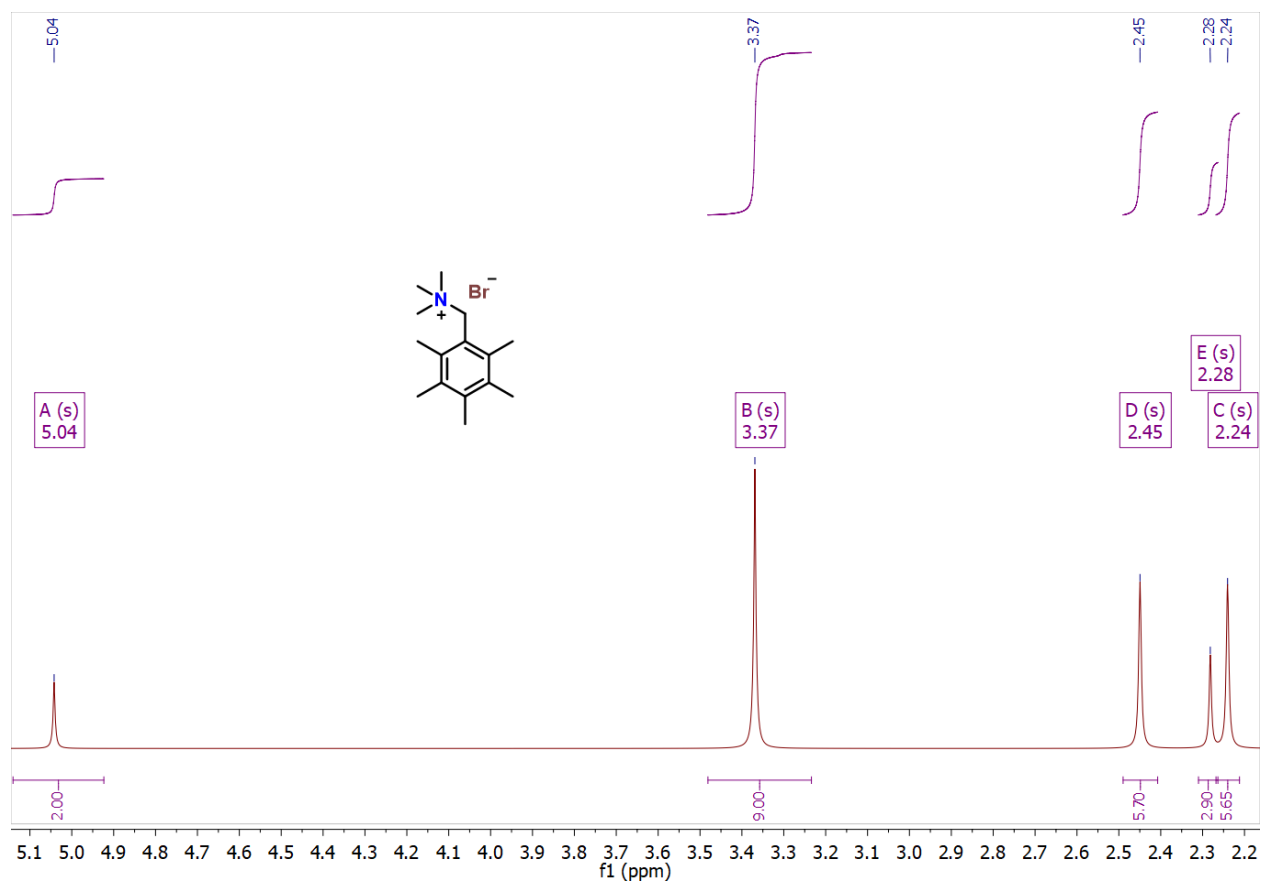

**Figure S2.** NMR spectrum of the trimethyl (2,3,4,5,6-pentamethylbenzyl) ammonium bromide ((R)Br, **3**) precursor in CDCl<sub>3</sub>.

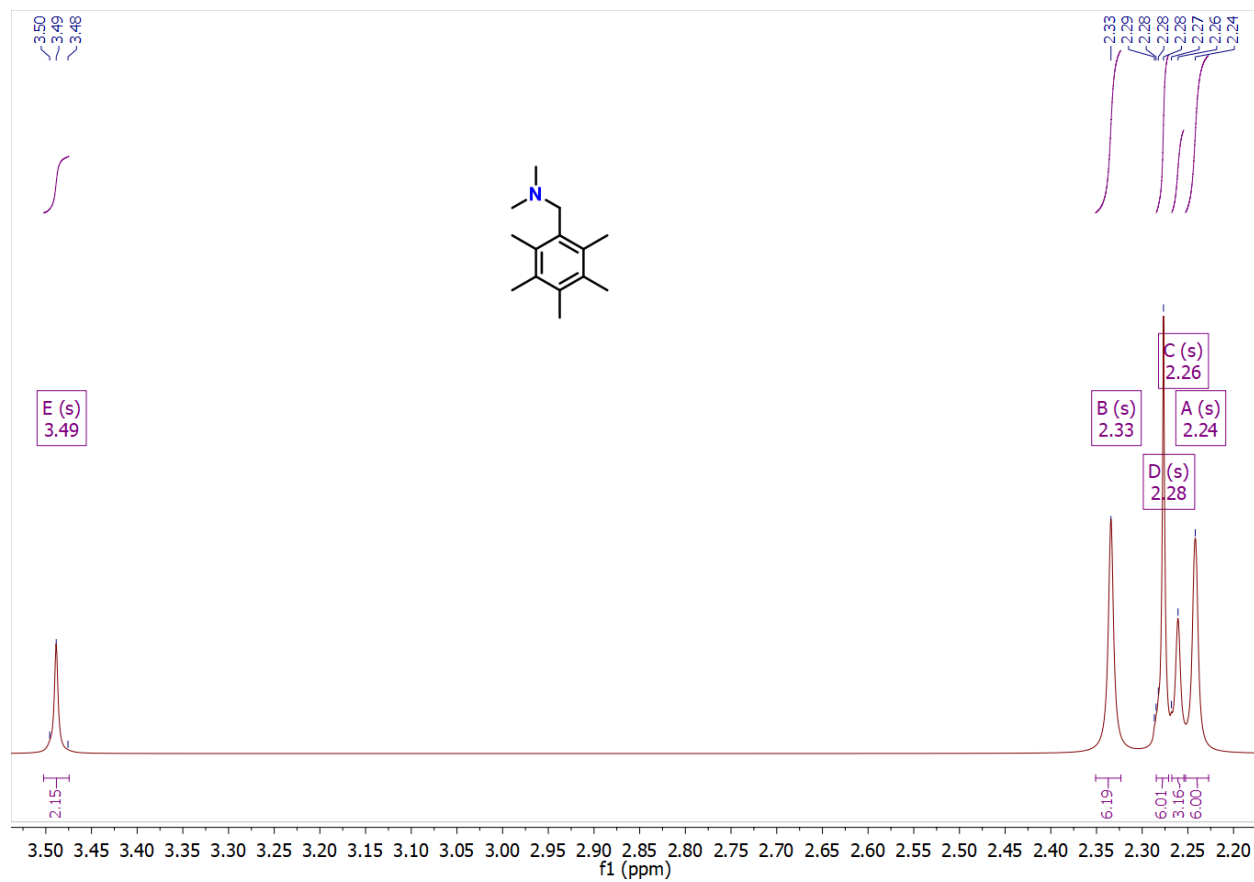

**Figure S3.** NMR spectrum of the N,N,2,3,4,5,6-heptamethyl-benzylamine (**4**) in CDCl<sub>3</sub> produced by the reaction outlined in section 2.4.

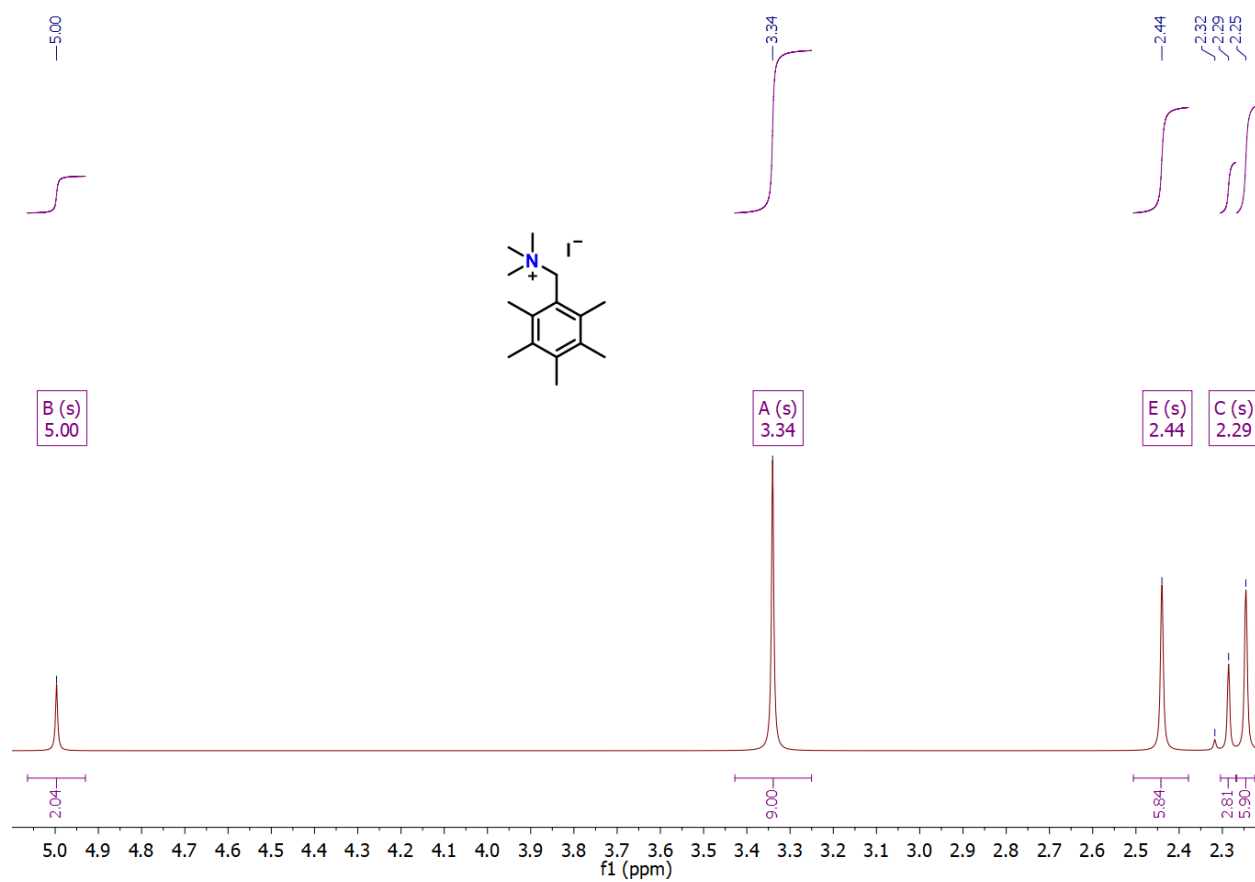

**Figure S4.** NMR spectrum of trimethyl (2,3,4,5,6-pentamethylbenzyl) ammonium iodide ((R)I, **5**) precursor in  $\text{CDCl}_3$ .

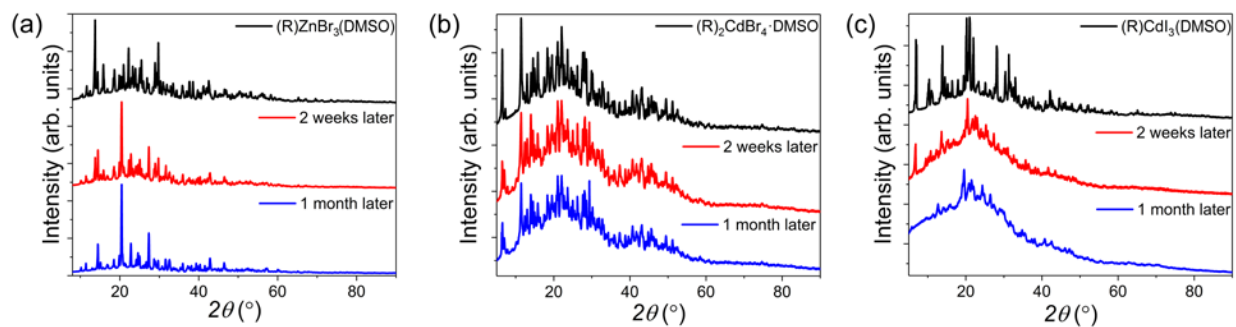

**Figure S5.** PXRD patterns of (a)  $(R)ZnBr_3(DMSO)$ , (b)  $(R)_2CdBr_4 \cdot DMSO$  and (c)  $(R)CdI_3(DMSO)$  samples left in ambient air for over a period of one month.

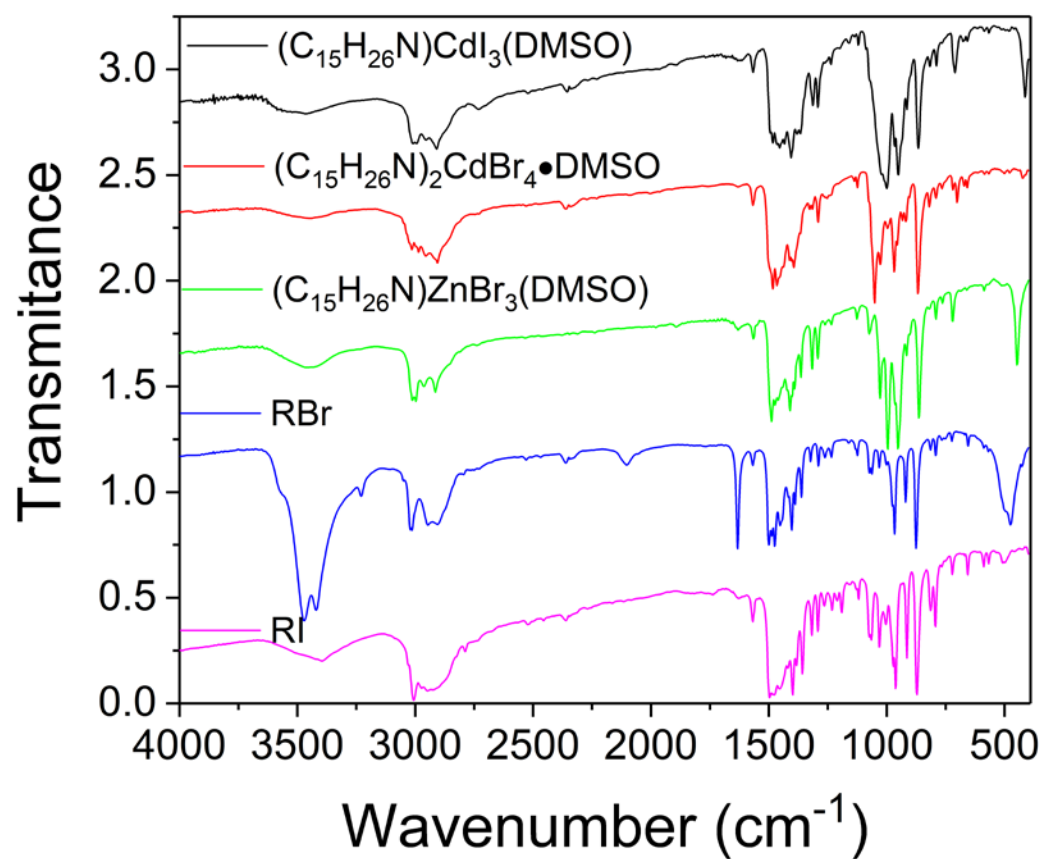

**Figure S6.** IR spectra of  $(R)ZnBr_3(DMSO)$ ,  $(R)_2CdBr_4 \bullet DMSO$ ,  $(R)CdI_3(DMSO)$  and the precursor organic salts  $(R)Br$  (**3**) and  $(R)I$  (**5**).

**Table S1.** Selected single crystal data collection and refinement parameters for (R)ZnBr<sub>3</sub>(DMSO), (R)<sub>2</sub>CdBr<sub>4</sub>·DMSO and (R)CdI<sub>3</sub>(DMSO) at 100(2) K.

| Formula                                                             | (R)ZnBr <sub>3</sub> (DMSO)                 | (R) <sub>2</sub> CdBr <sub>4</sub> ·DMSO | (R)CdI <sub>3</sub> (DMSO)                  |
|---------------------------------------------------------------------|---------------------------------------------|------------------------------------------|---------------------------------------------|
| Formula weight (g/mol)                                              | 603.59                                      | 950.90                                   | 791.59                                      |
| Temperature (K)                                                     | 100 (2)                                     |                                          |                                             |
| Radiation, wavelength (Å)                                           | Mo K $\alpha$ , 0.71073                     |                                          |                                             |
| Crystal system                                                      | Orthorhombic                                | Triclinic                                | Orthorhombic                                |
| Space group, <i>Z</i>                                               | <i>P</i> 2 <sub>1</sub> 2 <sub>1</sub> 2, 4 | <i>P</i> -1, 2                           | <i>P</i> 2 <sub>1</sub> 2 <sub>1</sub> 2, 4 |
| <i>a</i> (Å)                                                        | 8.9513(16)                                  | 8.829(7)                                 | 9.2030(10)                                  |
| <i>b</i> (Å)                                                        | 28.500(6)                                   | 14.244(10)                               | 29.304(3)                                   |
| <i>c</i> (Å)                                                        | 8.8203(16)                                  | 15.714(11)                               | 9.3602(11)                                  |
| $\alpha$ , °                                                        | 90                                          | 72.734(10)                               | 90                                          |
| $\beta$ , °                                                         | 90                                          | 89.356(10)                               | 90                                          |
| $\gamma$ , °                                                        | 90                                          | 89.710(10)                               | 90                                          |
| Volume (Å <sup>3</sup> )                                            | 2250.2(7)                                   | 1887(2)                                  | 2524.3(5)                                   |
| Density ( $\rho_{\text{calc}}$ ) (g/cm <sup>3</sup> )               | 1.782                                       | 1.674                                    | 2.083                                       |
| Absorption coefficient ( $\mu$ ) (mm <sup>-1</sup> )                | 6.517                                       | 4.895                                    | 4.622                                       |
| $\theta_{\text{min}} - \theta_{\text{max}}$ (°)                     | 2.31 – 26.34                                | 1.36 – 29.23                             | 1.39 – 31.46                                |
| Reflections collected                                               | 34552                                       | 32253                                    | 66066                                       |
| Independent reflections                                             | 4193                                        | 10050                                    | 8052                                        |
| <i>R</i> <sup>a</sup> indices ( <i>I</i> > 2 $\sigma$ ( <i>I</i> )) | <i>R</i> <sub>1</sub> = 0.0286              | <i>R</i> <sub>1</sub> = 0.0598           | <i>R</i> <sub>1</sub> = 0.0419              |
|                                                                     | <i>wR</i> <sub>2</sub> = 0.0561             | <i>wR</i> <sub>2</sub> = 0.1622          | <i>wR</i> <sub>2</sub> = 0.0915             |
| Goodness-of-fit on <i>F</i> <sup>2</sup>                            | 1.007                                       | 1.031                                    | 1.007                                       |
| Largest diff. peak and hole (e <sup>-</sup> /Å <sup>3</sup> )       | 0.344 and -0.335                            | 1.351 and -3.429                         | 1.320 and -0.926                            |

<sup>a</sup> $R_1 = \sum ||F_o| - |F_c|| / \sum |F_o|$ ;  $wR_2 = [\sum |w(F_o^2 - F_c^2)|^2 / \sum |w(F_o^2)|^2]^{1/2}$ , where  $w = 1/[\sigma^2 F_o^2 + (AP)^2 + BP]$ , with  $P = (F_o^2 + 2F_c^2)/3$  and weight coefficients *A* and *B*.

**Table S2.** Selected interatomic distances and angles in (R)ZnBr<sub>3</sub>(DMSO), (R)<sub>2</sub>CdBr<sub>4</sub>·DMSO and (R)CdI<sub>3</sub>(DMSO) at 298(2) K.

| Label                                              |     | Distance (Å) | Label (°)   | Angle       |
|----------------------------------------------------|-----|--------------|-------------|-------------|
| <b><u>(R)ZnBr<sub>3</sub>(DMSO)</u></b>            |     |              |             |             |
| Zn–                                                | O1  | 2.024(5)     | O1-Zn-Br1   | 104.61(17)  |
|                                                    | Br1 | 2.3796(13)   | O1-Zn-Br2   | 100.90(14)  |
|                                                    | Br2 | 2.3820(12)   | O1-Zn1-Br3  | 104.39(17)  |
|                                                    | Br3 | 2.3951(13)   | Br1-Zn1-Br3 | 116.19(5)   |
|                                                    |     |              | Br2-Zn-Br3  | 114.07(5)   |
|                                                    |     |              | Br1-Zn-Br2  | 114.30(5)   |
|                                                    |     |              |             |             |
| <b><u>(R)<sub>2</sub>CdBr<sub>4</sub>·DMSO</u></b> |     |              |             |             |
| Cd–                                                | Br1 | 2.6065(5)    | Br1-Cd-Br4  | 105.105(16) |
|                                                    | Br2 | 2.6035(5)    | Br1-Cd-Br3  | 110.057(17) |
|                                                    | Br3 | 2.5770(5)    | Br4-Cd-Br3  | 113.073(18) |
|                                                    | Br4 | 2.5959(5)    | Br1-Cd-Br2  | 114.355(17) |
|                                                    |     |              | Br4-Cd-Br2  | 105.954(18) |
|                                                    |     |              | Br3-Cd-Br2  | 108.321(17) |
| <b><u>(R)CdI<sub>3</sub>(DMSO)</u></b>             |     |              |             |             |
| Cd1–                                               | O1  | 2.247(7)     | O1-Cd1-I3   | 102.5(2)    |
|                                                    | I1  | 2.7283(8)    | O1-Cd1-I2   | 102.3(2)    |
|                                                    | I2  | 2.7201(8)    | O1-Cd1-I1   | 98.97(19)   |
|                                                    | I3  | 2.7305(8)    | I3-Cd1-I2   | 118.37(3)   |
|                                                    |     |              | I3-Cd1-I1   | 115.43(3)   |
|                                                    |     |              | I2-Cd1-I1   | 114.98(3)   |

**Table S3.** Selected interatomic distances (Å) and angles (°) in (R)ZnBr<sub>3</sub>(DMSO), (R)<sub>2</sub>CdBr<sub>4</sub>·DMSO and (R)CdI<sub>3</sub>(DMSO) at 100(2) K.

| Label                                              |     | Distance   | Label      | Angle      |
|----------------------------------------------------|-----|------------|------------|------------|
| <b><u>(R)ZnBr<sub>3</sub>(DMSO)</u></b>            |     |            |            |            |
| Zn–                                                | O1  | 2.026(3)   | O1-Zn-Br3  | 104.17(9)  |
|                                                    | Br1 | 2.3889(8)  | O1-Zn-Br1  | 100.82(9)  |
|                                                    | Br2 | 2.3967(7)  | Br3-Zn-Br1 | 114.20(3)  |
|                                                    | Br3 | 2.3812(7)  | O1-Zn1-Br2 | 103.86(9)  |
|                                                    |     |            | Br3-Zn-Br2 | 116.59(3)  |
|                                                    |     |            | Br1-Zn-Br2 | 114.54(3)  |
|                                                    |     |            |            |            |
| <b><u>(R)<sub>2</sub>CdBr<sub>4</sub>·DMSO</u></b> |     |            |            |            |
| Cd–                                                | Br1 | 2.571(2)   | Br1-Cd-Br4 | 108.55(4)  |
|                                                    | Br2 | 2.602(2)   | Br1-Cd-Br3 | 112.49(5)  |
|                                                    | Br3 | 2.5954(17) | Br4-Cd-Br3 | 105.47(5)  |
|                                                    | Br4 | 2.5943(17) | Br1-Cd-Br2 | 110.80(3)  |
|                                                    |     |            | Br4-Cd-Br2 | 114.92(6)  |
|                                                    |     |            | Br3-Cd-Br2 | 104.53(4)  |
| <b><u>(R)CdI<sub>3</sub>(DMSO)</u></b>             |     |            |            |            |
| Cd1–                                               | O1  | 2.262(6)   | O1-Cd1-I3  | 100.83(16) |
|                                                    | I1  | 2.7422(8)  | O1-Cd1-I2  | 102.28(17) |
|                                                    | I2  | 2.7421(8)  | O1-Cd1-I1  | 99.09(15)  |
|                                                    | I3  | 2.7273(8)  | I3-Cd1-I2  | 118.29(3)  |
|                                                    |     |            | I3-Cd1-I1  | 115.13(3)  |
|                                                    |     |            | I2-Cd1-I1  | 116.37(3)  |

## References

1. Mizoguchi, K.; Higashihara, T.; Ueda, M., Negative-working photosensitive poly (phenylene ether) based on poly (2, 6-dimethyl-1, 4-phenylene ether), a cross-linker, and a photoacid generator. *Macromolecules* **2010**, *43*, 2832-2839.
2. Longone, D. T.; Simanyi, L. H., Paracyclophanes. III. Octamethyl [2.2] paracyclophane. A Highly Strained Cyclophane1. *J. Org. Chem.* **1964**, *29*, 3245-3249.
3. Kantor, S. W.; Hauser, C. R., Rearrangements of benzyltrimethylammonium ion and related quaternary ammonium ions by sodium amide involving migration into the ring 1, 2, 3. *J. Am. Chem. Soc.* **1951**, *73*, 4122-4131.
